# Supplementary material for: Cyst fluid metabolites distinguish malignant from benign pancreatic cysts
Source: PubMed Central journal article supplement — Neoplasia. 2021 Sep 25;23(11):1078–88. doi: 10.1016/j.neo.2021.09.004 (PMC8479274; doi:10.1016/j.neo.2021.09.004), 2021-09-25
Supplement: mmc1.pdf [file mmc1.pdf]

## Supplementary Materials

### Metabolic profiling

Untargeted metabolomics of pancreatic cyst fluid was performed using LC-MS (0.2 mL cyst fluid). Briefly, 100  $\mu$ L of cyst fluid sample was mixed with 400  $\mu$ L of extraction solvent (methanol: acetonitrile: acetone, 1:1:1 by volume) and incubated at  $-20^{\circ}\text{C}$  for 1 hour followed by centrifugation (15,000 rpm for 10 minutes). The supernatant was transferred to a new tube and nitrogen dried. The samples were then reconstituted in 100  $\mu$ L of reconstitution solvent (methanol:  $\text{H}_2\text{O}$ , 2:98), vortexed, and centrifuged before transferred to an autosampler vial with insert. 1290 Infinity Binary LC system from Agilent was used for chromatographic separation together with Waters Acquity UPLC HSS T3 1.8  $\mu\text{m}$  2.1 x 100 mm column in connection with a Water Acquity UPLC HSS T3 1.8  $\mu\text{m}$  VanGuard pre-column. The detailed parameters were: data acquisition time 27 min, system equilibration time: 7 min, total run length: 34 min, flow rate: 0.45 ml/min, solvent A: 0.1% formic acid in water, solvent B: 0.1% formic acid in methanol, and column temperature:  $55^{\circ}\text{C}$ . Same chromatographic method was used for both positive and negative mode. Mass spectrometer settings were as follows: ion source: gas temperature -  $325^{\circ}\text{C}$ , drying gas flow - 10 l/min, nebulizer pressure - 45 psig, sheath gas temperature -  $400^{\circ}\text{C}$ , sheath gas flow - 12 l/ml, capillary voltage - 4000 V, fragmentor voltage - 140 V, skimmer voltage - 65 V, mass range 50-1000 m/z, acquisition rate 2 spectra/s. Inline mass calibration was performed using debrisoquine sulfate (m/z 176.1182) and HP-0921 from Agilent (m/z 922.0098) in positive mode and 4-NBA (m/z 166.0146) and HP-0921 from Agilent (m/z 966.0007, formate adduct) in negative mode.
